# Supplementary material for: A study of the mechanism of fluoride adsorption from aqueous solutions onto Fe-impregnated chitosan
Source: Royal Society of Chemistry journal article supplement (doi:10.1039/c5cp00817d), 2015-01-01
Supplement: c5cp00817d1.pdf [file c5cp00817d1.pdf]

**Electronic Supplementary Information**

Table. the change in F<sup>-</sup> and Cl<sup>-</sup> molar concentration with initial fluoride concentration in an aqueous solution after adsorption

| initial fluoride concentration<br>(mg/L) | the increase in Cl<br>(mmol/L) | the decrease in F<br>(mmol/L) |
|------------------------------------------|--------------------------------|-------------------------------|
| 5                                        | 0.3259                         | 0.2491                        |
| 10                                       | 0.677                          | 0.4924                        |
| 25                                       | 0.8267                         | 1.2059                        |
| 50                                       | 1.4083                         | 2.1631                        |
| 100                                      | 2.7597                         | 3.9288                        |
